# Supplementary material
Source: PubMed Central journal article supplement (PMC3202154)
Supplement: supp_kwr140_kwr140_Web_Appendix.pdf [file supp_kwr140_kwr140_Web_Appendix.pdf]

Web Appendix to  
‘Evaluation and Comparison of Food Records, Recalls, and Frequencies for Energy and  
Protein Assessment Using Recovery Biomarkers’

Ross L. Prentice et al

This appendix provides calibration equations for energy, protein, and protein density assessment in similar format to Table 4 in the main paper, for subsets of the Nutrition and Physical Activity Assessment Study (NPAAS) defined by race/ethnicity (white, black, Hispanic), and by body mass index (<25.0, 25.0-29.9, ≥30.0).

Web Table 1. Calibration Equation Coefficients ( $\beta$ ), Standard Errors (SE), and Percent of Biomarker Variation Explained ( $R^2$ ) Stratified by Race/Ethnicity

| Variable             | FFQ     |                    |       | 4DFR    |                    |       | 24HR    |                    |       |
|----------------------|---------|--------------------|-------|---------|--------------------|-------|---------|--------------------|-------|
|                      | $\beta$ | SE                 | $R^2$ | $\beta$ | SE                 | $R^2$ | $\beta$ | SE                 | $R^2$ |
| <b>Energy</b>        |         |                    |       |         |                    |       |         |                    |       |
| White Women          |         |                    |       |         |                    |       |         |                    |       |
| Intercept            | 7.614   | 0.009              |       | 7.589   | 0.010              |       | 7.602   | 0.009              |       |
| Log-Energy           | 0.062   | 0.025 <sup>a</sup> | 5.8   | 0.221   | 0.037 <sup>a</sup> | 13.7  | 0.147   | 0.032 <sup>a</sup> | 6.5   |
| BMI                  | 0.014   | 0.002 <sup>a</sup> | 25.1  | 0.014   | 0.001 <sup>a</sup> | 25.2  | 0.014   | 0.001 <sup>a</sup> | 27.5  |
| Age                  | -0.010  | 0.001 <sup>a</sup> | 11.3  | -0.009  | 0.001 <sup>a</sup> | 9.0   | -0.010  | 0.001 <sup>a</sup> | 10.3  |
| (Total) <sup>b</sup> |         |                    | 42.1  |         |                    | 48.0  |         |                    | 44.3  |
| Black Women          |         |                    |       |         |                    |       |         |                    |       |
| Intercept            | 7.599   | 0.020              |       | 7.591   | 0.020              |       | 7.597   | 0.019              |       |
| Log-Energy           | 0.023   | 0.030              | 1.8   | 0.038   | 0.057              | 0.0   | -0.042  | 0.059              | 3.0   |
| BMI                  | 0.000   | 0.003 <sup>a</sup> | 19.4  | 0.010   | 0.003 <sup>a</sup> | 21.1  | 0.009   | 0.003 <sup>a</sup> | 18.9  |
| Age                  | -0.011  | 0.003 <sup>a</sup> | 13.4  | -0.011  | 0.003 <sup>a</sup> | 13.4  | -0.011  | 0.003 <sup>a</sup> | 12.7  |
| (Total) <sup>b</sup> |         |                    | 34.6  |         |                    | 34.5  |         |                    | 34.6  |
| Hispanic Women       |         |                    |       |         |                    |       |         |                    |       |
| Intercept            | 7.557   | 0.019              |       | 7.539   | 0.020              |       | 7.545   | 0.020              |       |
| Log-Energy           | 0.077   | 0.035 <sup>a</sup> | 6.0   | 0.099   | 0.082              | 12.4  | 0.050   | 0.074              | 6.4   |
| BMI                  | 0.015   | 0.002 <sup>a</sup> | 39.1  | 0.014   | 0.003 <sup>a</sup> | 31.0  | 0.015   | 0.003 <sup>a</sup> | 35.4  |
| Age                  | -0.006  | 0.003              | 2.8   | -0.004  | 0.004              | 1.4   | -0.005  | 0.004              | 1.7   |
| (Total) <sup>b</sup> |         |                    | 47.9  |         |                    | 44.7  |         |                    | 43.6  |
| <b>Protein</b>       |         |                    |       |         |                    |       |         |                    |       |
| White Women          |         |                    |       |         |                    |       |         |                    |       |
| Intercept            | 4.258   | 0.017              |       | 4.224   | 0.015              |       | 4.267   | 0.015              |       |
| Log-Protein          | 0.169   | 0.042 <sup>a</sup> | 9.3   | 0.565   | 0.053 <sup>a</sup> | 33.1  | 0.437   | 0.053 <sup>a</sup> | 21.2  |
| BMI                  | 0.010   | 0.003 <sup>a</sup> | 5.4   | 0.010   | 0.002 <sup>a</sup> | 4.7   | 0.010   | 0.003 <sup>a</sup> | 5.4   |
| Age                  | -0.011  | 0.003 <sup>a</sup> | 5.3   | -0.007  | 0.002 <sup>a</sup> | 1.8   | -0.011  | 0.002 <sup>a</sup> | 4.7   |
| (Total) <sup>b</sup> |         |                    | 19.9  |         |                    | 39.6  |         |                    | 31.4  |
| Black Women          |         |                    |       |         |                    |       |         |                    |       |
| Intercept            | 4.124   | 0.046              |       | 4.090   | 0.042              |       | 4.105   | 0.041              |       |
| Log-Protein          | 0.081   | 0.061              | 4.9   | 0.187   | 0.119              | 2.5   | 0.119   | 0.156              | 0.2   |
| BMI                  | 0.013   | 0.006 <sup>a</sup> | 8.8   | 0.014   | 0.006 <sup>a</sup> | 10.8  | 0.013   | 0.006 <sup>a</sup> | 9.1   |
| Age                  | -0.012  | 0.006              | 3.6   | -0.014  | 0.006 <sup>a</sup> | 4.8   | -0.012  | 0.006              | 4.2   |
| (Total) <sup>b</sup> |         |                    | 17.3  |         |                    | 18.1  |         |                    | 13.5  |
| Hispanic Women       |         |                    |       |         |                    |       |         |                    |       |
| Intercept            | 4.177   | 0.035              |       | 4.164   | 0.033              |       | 4.192   | 0.034              |       |
| Log-Protein          | 0.112   | 0.059              | 5.0   | 0.365   | 0.121 <sup>a</sup> | 14.7  | 0.336   | 0.118 <sup>a</sup> | 13.2  |
| BMI                  | 0.014   | 0.005 <sup>a</sup> | 15.2  | 0.014   | 0.004 <sup>a</sup> | 13.4  | 0.015   | 0.004 <sup>a</sup> | 15.8  |
| Age                  | -0.013  | 0.007 <sup>a</sup> | 5.2   | -0.010  | 0.006              | 3.3   | -0.009  | 0.006              | 2.4   |
| (Total) <sup>b</sup> |         |                    | 25.4  |         |                    | 31.3  |         |                    | 31.5  |

Web Table 1 (continued).

| Variable               | FFQ     |                    |                | 4DFR    |                    |                | 24HR    |                    |                |
|------------------------|---------|--------------------|----------------|---------|--------------------|----------------|---------|--------------------|----------------|
|                        | $\beta$ | SE                 | R <sup>2</sup> | $\beta$ | SE                 | R <sup>2</sup> | $\beta$ | SE                 | R <sup>2</sup> |
| <b>Protein Density</b> |         |                    |                |         |                    |                |         |                    |                |
| White Women            |         |                    |                |         |                    |                |         |                    |                |
| Intercept              | 2.651   | 0.017              |                | 2.670   | 0.016              |                | 2.692   | 0.018              |                |
| Log-Protein Density    | 0.284   | 0.088 <sup>a</sup> | 3.6            | 0.490   | 0.080 <sup>a</sup> | 12.4           | 0.453   | 0.086 <sup>a</sup> | 9.2            |
| BMI                    | -0.003  | 0.003              | 0.4            | -0.002  | 0.003              | 0.3            | -0.004  | 0.003              | 0.5            |
| Age                    | -0.002  | 0.003              | 0.1            | -0.0005 | 0.003              | 0.0            | -0.002  | 0.003              | 0.3            |
| (Total) <sup>b</sup>   |         |                    | 4.1            |         |                    | 12.7           |         |                    | 10.0           |
| Black Women            |         |                    |                |         |                    |                |         |                    |                |
| Intercept              | 2.534   | 0.044              |                | 2.528   | 0.043              |                | 2.519   | 0.044              |                |
| Log-Protein Density    | 0.218   | 0.161              | 2.8            | 0.276   | 0.169              | 4.2            | 0.043   | 0.191              | 0.1            |
| BMI                    | 0.004   | 0.006              | 0.5            | 0.003   | 0.006              | 0.3            | 0.005   | 0.006              | 1.0            |
| Age                    | 0.002   | 0.007              | 0.1            | 0.001   | 0.006              | 0.0            | 0.001   | 0.007              | 0.0            |
| (Total) <sup>b</sup>   |         |                    | 3.4            |         |                    | 4.5            |         |                    | 1.1            |
| Hispanic Women         |         |                    |                |         |                    |                |         |                    |                |
| Intercept              | 2.600   | 0.036              |                | 2.635   | 0.037              |                | 2.634   | 0.039              |                |
| Log-Protein Density    | 0.479   | 0.174 <sup>a</sup> | 13.3           | 0.632   | 0.210 <sup>a</sup> | 13.7           | 0.318   | 0.164              | 8.7            |
| BMI                    | -0.001  | 0.005              | 0.0            | 0.002   | 0.005              | 0.5            | 0.0001  | 0.005              | 0.1            |
| Age                    | -0.009  | 0.007              | 2.7            | -0.010  | 0.007              | 3.8            | -0.008  | 0.007              | 2.4            |
| (Total) <sup>b</sup>   |         |                    | 15.9           |         |                    | 17.9           |         |                    | 11.2           |

BMI, body mass index; FFQ, food frequency questionnaire; 4DFR, four-day food record; 24HR, 24-hour dietary recall

Numbers of women contributing to the FFQ, 4DFR, and 24HR energy analyses are 268, 268, 266, white; 79, 79, 79, black; and 55, 55, 54, Hispanic. Corresponding numbers for protein analyses are 284, 284, 282, white; 82, 82, 81, black; and 63, 63, 62, Hispanic. Protein density numbers are 264, 264, 262, white; 77, 77, 77, black; and 54, 53, 53, Hispanic.

<sup>a</sup>Coefficient differs from zero at p=0.05 significance level

<sup>b</sup>Total – percent of log-biomarker variation explained by all variables. See Table 4 footnote for explanation of R<sup>2</sup> calculations.

Web Table 2. Calibration Equation Coefficients ( $\beta$ ), Standard Errors (SE), and Percent of Biomarker Variation Explained ( $R^2$ ) Stratified by Body Mass Index

| Variable                    | FFQ     |                    |                  | 4DFR    |                    |                  | 24HR    |                    |                  |
|-----------------------------|---------|--------------------|------------------|---------|--------------------|------------------|---------|--------------------|------------------|
|                             | $\beta$ | SE                 | $R^2$            | $\beta$ | SE                 | $R^2$            | $\beta$ | SE                 | $R^2$            |
| <b>Energy</b>               |         |                    |                  |         |                    |                  |         |                    |                  |
| Body Mass Index < 25.0      |         |                    |                  |         |                    |                  |         |                    |                  |
| Intercept                   | 7.646   | 0.025              |                  | 7.609   | 0.026              |                  | 7.630   | 0.025              |                  |
| Log-Energy                  | 0.068   | 0.032 <sup>a</sup> | 1.8              | 0.228   | 0.050 <sup>a</sup> | 12.4             | 0.186   | 0.050 <sup>a</sup> | 4.3              |
| BMI                         | 0.020   | 0.004 <sup>a</sup> | 15.4             | 0.018   | 0.004 <sup>a</sup> | 12.8             | 0.021   | 0.004 <sup>a</sup> | 16.4             |
| Age                         | -0.008  | 0.002 <sup>a</sup> | 7.8              | -0.008  | 0.002 <sup>a</sup> | 6.9              | -0.008  | 0.002 <sup>a</sup> | 8.4              |
| Black                       | 0.013   | 0.041              |                  | -0.002  | 0.039              |                  | 0.011   | 0.040              |                  |
| Hispanic                    | -0.079  | 0.038 <sup>a</sup> | 2.2 <sup>b</sup> | -0.070  | 0.036              | 1.6 <sup>b</sup> | -0.074  | 0.037 <sup>a</sup> | 1.9 <sup>b</sup> |
| Other Minority              | -0.024  | 0.053              |                  | -0.016  | 0.050              |                  | -0.020  | 0.051              |                  |
| (Total)                     |         |                    | 27.1             |         |                    | 33.7             |         |                    | 31.1             |
| Body Mass Index 25.0 – 29.9 |         |                    |                  |         |                    |                  |         |                    |                  |
| Intercept                   | 7.611   | 0.019              |                  | 7.600   | 0.020              |                  | 7.614   | 0.019              |                  |
| Log-Energy                  | 0.049   | 0.032              | 3.5              | 0.131   | 0.065 <sup>a</sup> | 8.5              | 0.051   | 0.053              | 1.8              |
| BMI                         | 0.019   | 0.006 <sup>a</sup> | 17.8             | 0.018   | 0.006 <sup>a</sup> | 14.2             | 0.019   | 0.006 <sup>a</sup> | 17.0             |
| Age                         | -0.008  | 0.002 <sup>a</sup> | 8.9              | -0.008  | 0.002 <sup>a</sup> | 8.5              | -0.009  | 0.002 <sup>a</sup> | 9.5              |
| Black                       | -0.018  | 0.039              |                  | -0.022  | 0.037              |                  | -0.038  | 0.036              |                  |
| Hispanic                    | 0.007   | 0.040              | 0.2 <sup>b</sup> | 0.015   | 0.040              | 0.5 <sup>b</sup> | 0.007   | 0.041              | 1.0 <sup>b</sup> |
| Other Minority              | -0.003  | 0.101              |                  | -0.003  | 0.101              |                  | -0.013  | 0.102              |                  |
| (Total)                     |         |                    | 30.4             |         |                    | 31.7             |         |                    | 29.3             |
| Body Mass Index $\geq$ 30.0 |         |                    |                  |         |                    |                  |         |                    |                  |
| Intercept                   | 7.629   | 0.018              |                  | 7.618   | 0.018              |                  | 7.625   | 0.017              |                  |
| Log-Energy                  | 0.042   | 0.025              | 5.7              | 0.112   | 0.040 <sup>a</sup> | 7.3              | 0.061   | 0.036              | 6.5              |
| BMI                         | 0.012   | 0.002 <sup>a</sup> | 18.1             | 0.012   | 0.002 <sup>a</sup> | 18.9             | 0.012   | 0.002 <sup>a</sup> | 19.2             |
| Age                         | -0.013  | 0.002 <sup>a</sup> | 16.5             | -0.012  | 0.002 <sup>a</sup> | 14.2             | -0.011  | 0.002 <sup>a</sup> | 13.6             |
| Black                       | -0.053  | 0.025 <sup>a</sup> |                  | -0.052  | 0.024 <sup>a</sup> |                  | -0.046  | 0.024              |                  |
| Hispanic                    | -0.105  | 0.032 <sup>a</sup> | 4.7 <sup>b</sup> | -0.119  | 0.030 <sup>a</sup> | 6.4 <sup>b</sup> | -0.107  | 0.030 <sup>a</sup> | 5.5 <sup>b</sup> |
| Other Minority              | -0.105  | 0.091              |                  | -0.109  | 0.089              |                  | -0.098  | 0.086              |                  |
| (Total)                     |         |                    | 45.0             |         |                    | 46.8             |         |                    | 44.8             |

Web Table 2 (continued).

| Variable                    | FFQ     |                    |                  | 4DFR    |                    |                  | 24HR    |                    |                  |
|-----------------------------|---------|--------------------|------------------|---------|--------------------|------------------|---------|--------------------|------------------|
|                             | $\beta$ | SE                 | R <sup>2</sup>   | $\beta$ | SE                 | R <sup>2</sup>   | $\beta$ | SE                 | R <sup>2</sup>   |
| <b>Protein</b>              |         |                    |                  |         |                    |                  |         |                    |                  |
| Body Mass Index < 25.0      |         |                    |                  |         |                    |                  |         |                    |                  |
| Intercept                   | 4.242   | 0.048              |                  | 4.179   | 0.041              |                  | 4.236   | 0.043              |                  |
| Log-Protein                 | 0.178   | 0.052 <sup>a</sup> | 8.5              | 0.643   | 0.069 <sup>a</sup> | 35.1             | 0.537   | 0.074 <sup>a</sup> | 22.9             |
| BMI                         | 0.004   | 0.008              | 0.3              | 0.002   | 0.007              | 0.0              | 0.003   | 0.007              | 0.2              |
| Age                         | -0.011  | 0.004 <sup>a</sup> | 4.4              | -0.008  | 0.003 <sup>a</sup> | 2.3              | -0.012  | 0.003 <sup>a</sup> | 4.9              |
| Black                       | -0.097  | 0.080              |                  | -0.154  | 0.066 <sup>a</sup> |                  | -0.125  | 0.071              |                  |
| Hispanic                    | -0.116  | 0.069              | 1.9 <sup>b</sup> | -0.088  | 0.057              | 2.6 <sup>b</sup> | -0.129  | 0.060 <sup>a</sup> | 2.8 <sup>b</sup> |
| Other Minority              | -0.027  | 0.100              |                  | 0.031   | 0.084              |                  | -0.056  | 0.090              |                  |
| (Total)                     |         |                    | 15.0             |         |                    | 40.0             |         |                    | 30.8             |
| Body Mass Index 25.0 – 29.9 |         |                    |                  |         |                    |                  |         |                    |                  |
| Intercept                   | 4.190   | 0.037              |                  | 4.176   | 0.035              |                  | 4.217   | 0.036              |                  |
| Log-Protein                 | 0.121   | 0.055 <sup>a</sup> | 8.2              | 0.438   | 0.094 <sup>a</sup> | 23.4             | 0.311   | 0.092 <sup>a</sup> | 10.8             |
| BMI                         | 0.007   | 0.011              | 1.1              | 0.004   | 0.010              | 0.3              | 0.006   | 0.010              | 0.8              |
| Age                         | -0.012  | 0.005 <sup>a</sup> | 5.2              | -0.009  | 0.004 <sup>a</sup> | 2.1              | -0.013  | 0.004 <sup>a</sup> | 5.4              |
| Black                       | -0.098  | 0.077              |                  | -0.099  | 0.068              |                  | -0.153  | 0.070 <sup>a</sup> |                  |
| Hispanic                    | -0.001  | 0.080              | 1.5 <sup>b</sup> | 0.001   | 0.074              | 1.8 <sup>b</sup> | -0.014  | 0.077              | 3.9 <sup>b</sup> |
| Other Minority              | 0.015   | 0.168              |                  | 0.053   | 0.156              |                  | -0.012  | 0.162              |                  |
| (Total)                     |         |                    | 16.0             |         |                    | 27.7             |         |                    | 21.0             |
| Body Mass Index ≥ 30.0      |         |                    |                  |         |                    |                  |         |                    |                  |
| Intercept                   | 4.270   | 0.037              |                  | 4.262   | 0.036              |                  | 4.284   | 0.035              |                  |
| Log-Protein                 | 0.100   | 0.047 <sup>a</sup> | 7.7              | 0.278   | 0.078 <sup>a</sup> | 11.8             | 0.326   | 0.081 <sup>a</sup> | 15.7             |
| BMI                         | 0.014   | 0.004 <sup>a</sup> | 6.5              | 0.014   | 0.004 <sup>a</sup> | 5.5              | 0.012   | 0.004 <sup>a</sup> | 4.3              |
| Age                         | -0.013  | 0.004 <sup>a</sup> | 4.0              | -0.012  | 0.004 <sup>a</sup> | 3.3              | -0.010  | 0.004 <sup>a</sup> | 2.1              |
| Black                       | -0.137  | 0.055 <sup>a</sup> |                  | -0.153  | 0.050 <sup>a</sup> |                  | -0.133  | 0.051 <sup>a</sup> |                  |
| Hispanic                    | -0.084  | 0.064              | 3.3 <sup>b</sup> | -0.086  | 0.060              | 4.6 <sup>b</sup> | -0.040  | 0.062              | 3.5 <sup>b</sup> |
| Other Minority              | -0.057  | 0.191              |                  | -0.075  | 0.186              |                  | 0.007   | 0.184              |                  |
| (Total)                     |         |                    | 21.5             |         |                    | 25.3             |         |                    | 25.7             |

Web Table 2 (continued).

| Variable                    | FFQ     |                    |                  | 4DFR    |                    |                  | 24HR    |                    |                  |
|-----------------------------|---------|--------------------|------------------|---------|--------------------|------------------|---------|--------------------|------------------|
|                             | $\beta$ | SE                 | R <sup>2</sup>   | $\beta$ | SE                 | R <sup>2</sup>   | $\beta$ | SE                 | R <sup>2</sup>   |
| <b>Protein Density</b>      |         |                    |                  |         |                    |                  |         |                    |                  |
| Body Mass Index < 25.0      |         |                    |                  |         |                    |                  |         |                    |                  |
| Intercept                   | 2.567   | 0.045              |                  | 2.604   | 0.044              |                  | 2.608   | 0.045              |                  |
| Log-Protein Density         | 0.510   | 0.117 <sup>a</sup> | 9.9              | 0.579   | 0.105 <sup>a</sup> | 15.1             | 0.492   | 0.101 <sup>a</sup> | 10.3             |
| BMI                         | -0.023  | 0.008 <sup>a</sup> | 5.6              | -0.019  | 0.007 <sup>a</sup> | 4.8              | -0.023  | 0.007 <sup>a</sup> | 5.9              |
| Age                         | -0.005  | 0.003              | 0.9              | -0.003  | 0.003              | 0.5              | -0.005  | 0.003              | 1.0              |
| Black                       | -0.092  | 0.074              |                  | -0.148  | 0.070 <sup>a</sup> |                  | -0.152  | 0.072 <sup>a</sup> |                  |
| Hispanic                    | -0.047  | 0.066              | 1.2 <sup>b</sup> | -0.042  | 0.064              | 2.3 <sup>b</sup> | -0.060  | 0.065              | 2.7 <sup>b</sup> |
| Other Minority              | -0.070  | 0.093              |                  | -0.011  | 0.090              |                  | -0.069  | 0.092              |                  |
| (Total)                     |         |                    | 17.6             |         |                    | 22.7             |         |                    | 19.9             |
| Body Mass Index 25.0 – 29.9 |         |                    |                  |         |                    |                  |         |                    |                  |
| Intercept                   | 2.585   | 0.038              |                  | 2.605   | 0.037              |                  | 2.608   | 0.040              |                  |
| Log-Protein Density         | 0.263   | 0.141              | 3.8              | 0.436   | 0.140 <sup>a</sup> | 9.9              | 0.276   | 0.140 <sup>a</sup> | 3.8              |
| BMI                         | -0.014  | 0.012              | 2.9              | -0.006  | 0.012              | 1.6              | -0.012  | 0.012              | 2.3              |
| Age                         | -0.002  | 0.005              | 0.1              | 0.002   | 0.005              | 0.3              | -0.002  | 0.005              | 0.1              |
| Black                       | -0.079  | 0.075              |                  | -0.095  | 0.072              |                  | -0.101  | 0.074              |                  |
| Hispanic                    | -0.048  | 0.084              | 1.4 <sup>b</sup> | -0.068  | 0.083              | 2.0 <sup>b</sup> | -0.048  | 0.084              | 2.3 <sup>b</sup> |
| Other Minority              | -0.111  | 0.208              |                  | -0.082  | 0.201              |                  | -0.163  | 0.206              |                  |
| (Total)                     |         |                    | 8.1              |         |                    | 13.7             |         |                    | 8.5              |
| Body Mass Index ≥ 30.0      |         |                    |                  |         |                    |                  |         |                    |                  |
| Intercept                   | 2.640   | 0.039              |                  | 2.671   | 0.039              |                  | 2.687   | 0.040              |                  |
| Log-Protein Density         | 0.312   | 0.108 <sup>a</sup> | 6.2              | 0.433   | 0.112 <sup>a</sup> | 8.6              | 0.428   | 0.125 <sup>a</sup> | 6.9              |
| BMI                         | 0.003   | 0.005              | 0.0              | 0.001   | 0.004              | 0.0              | 0.002   | 0.005              | 0.0              |
| Age                         | 0.001   | 0.004              | 0.1              | 0.001   | 0.004              | 0.1              | -0.002  | 0.004              | 0.0              |
| Black                       | -0.074  | 0.055              |                  | -0.105  | 0.054              |                  | -0.106  | 0.054              |                  |
| Hispanic                    | -0.008  | 0.069              | 1.2 <sup>b</sup> | 0.010   | 0.068              | 2.7 <sup>b</sup> | 0.016   | 0.070              | 2.8 <sup>b</sup> |
| Other Minority              | -0.008  | 0.196              |                  | -0.007  | 0.192              |                  | -0.004  | 0.195              |                  |
| (Total)                     |         |                    | 7.6              |         |                    | 11.4             |         |                    | 9.8              |

BMI, body mass index; FFQ, food frequency questionnaire; 4DFR, four-day food record; 24HR, 24-hour dietary recall

The numbers of women contributing to the FFQ, 4DFR, and 24HR analyses among women having BMI < 25.0 are 165, 165, 165; among women having 25.0 ≤ BMI ≤ 29.9 are 97, 97, 97; and among women having BMI ≥ 30.0 are 153, 153, 150. Corresponding numbers of women for protein are 177, 177, 177 for BMI < 25.0; 106, 106, 106 for 25.0 ≤ BMI ≤ 29.9; and are 160, 160, 156 for BMI ≥ 30.0. Numbers for

protein density are 163, 163, 163 for BMI < 25.0; 97, 96, 97 for  $25.0 \leq \text{BMI} \leq 29.9$ ; and 148, 148, 145 for BMI  $\geq 30.0$ .

<sup>a</sup>Coefficient significantly differs from zero at  $p=0.05$  significance level

<sup>b</sup>Percent of variation in log-biomarker attributable to overall race/ethnicity classification. See Table 4 footnote for explanation of  $R^2$  calculations.
